# Supplementary material for: Performance and stability enhancement of perovskite photodetectors by additive and interface engineering using a dual-functional PPS zwitterion
Source: Royal Society of Chemistry journal article supplement (doi:10.1039/d3nh00263b), 2023-01-01
Supplement: d3nh00263b1.pdf [file d3nh00263b1.pdf]

## Supplementary Information

### Performance and Stability Enhancement of Perovskite Photodetectors by Additive and Interface Engineering Using a Dual-Functional PPS Zwitterion

Abbas Ahmad Khan,<sup>a</sup> Navneet Kumar,<sup>a</sup> Uijin Jung,<sup>a</sup> Wonjun Heo,<sup>b</sup> Zhaozhong Tan,<sup>a</sup> Jinsub Park<sup>\*a,b</sup>

<sup>a</sup> Department of Electronic Engineering, Hanyang University, Seoul 04763, Republic of Korea

<sup>b</sup> Division of Nanoscale Semiconductor Engineering, Hanyang University, Seoul 04763, Republic of Korea

\*Corresponding Author: [jinsubpark@hanyang.ac.kr](mailto:jinsubpark@hanyang.ac.kr)



Fig. S1: Detailed fabrication process



**Fig. S2:** Cross-sectional SEM image of device without PPS inlayer



**Fig. S3:** Top-view SEM images of SnO<sub>2</sub> (a) without PPS (b) with PPS



**Fig S4:** Large area top-view SEM images of perovskite films at (a) Control 0% (b) 0.2% PPS (c) 0.4% PPS (c) 0.4% PPS (d) 0.6% PPS



**Fig S5:** Ratio of (110) peak intensity of perovskite with various PPS concentration.



**Fig S6:** Tauc plot of (a) CsMAPbI<sub>3</sub> (b) 0.2% PPS (c) 0.4% PPS (d) 0.6% PPS



**Fig S7:** (a) XPS spectra of S 2p of SnO<sub>2</sub> and SnO<sub>2</sub>/PPS layers. (b) FTIR spectra of PPS and PPS zwitterion incorporated perovskite.



**Fig S8:** Deconvoluted C 1s and (d) deconvoluted O 1s spectra of Perovskite.



**Fig S9:** Cross-sectional SEM Images with the thickness (a) control and (b) 0.4% PPS incorporated perovskite films



**Fig S10:** (a) PL spectra of complete devices (b) TRPL spectra of complete devices



**Fig S11:** Perovskite only devices at different concentrations (a) dark current (b) photocurrent. PPS incorporated Perovskite devices with SnO<sub>2</sub> layer (c) dark current (d) photocurrent



**Fig S12:** Different interlayer concentration of PPS (a) dark current (b) photocurrent



**Fig S13:** Sample stability images with and without PPS for over 30 days.



**Fig S14:** Thermal stability of samples with and without PPS

**Table S1:** FWHM and Crystallite size of (110) peak of perovskite with different concentration of PPS.

|                | FWHM   | Crystallite Size (nm) |
|----------------|--------|-----------------------|
| <b>Control</b> | 0.1359 | 65.5                  |
| <b>0.2%</b>    | 0.1374 | 64.80                 |
| <b>0.4%</b>    | 0.1385 | 64.28                 |
| <b>0.6%</b>    | 0.1404 | 63.32                 |

**Table S2:** FWHM of control and with PPS incorporated perovskite films.

| Peak         | FWHM of Control | FWHM of Psk:PPS (0.4%) |
|--------------|-----------------|------------------------|
| <b>(110)</b> | 0.1359          | 0.1374                 |
| <b>(220)</b> | 0.1705          | 0.1682                 |
| <b>(310)</b> | 0.1913          | 0.1872                 |

**Table S3:** Atomic concentration of the elements.

| Atom      | Atomic % in PSk | Atomic% in PSK:PPS |
|-----------|-----------------|--------------------|
| <b>C</b>  | 28.09           | 24.54              |
| <b>O</b>  | 6.15            | 4.46               |
| <b>I</b>  | 53.01           | 57.8               |
| <b>Pb</b> | 12.75           | 13.2               |

**Table S4:** Fitted parameters of TRPL decay in figure 5b.

| Film           | A       | $\tau_1$ (ns) | B       | $\tau_2$ (ns) | $\tau_{avg}$ (ns) |
|----------------|---------|---------------|---------|---------------|-------------------|
| <b>Psk</b>     | 0.78663 | 2.92794       | 0.56691 | 11.95355      | 9.664089          |
| <b>Psk:PPS</b> | 0.48183 | 23.87487      | 0.14917 | 78.20074      | 51.22724          |

**Table S5:** Fitted parameters of TRPL decay in figure S10(b)

| Film                          | A      | $\tau_1$ (ns) | B      | $\tau_2$ (ns) | $\tau_{avg}$ (ns) |
|-------------------------------|--------|---------------|--------|---------------|-------------------|
| <b>SnO2/Psk:PPS</b>           | 141.41 | 164           | 1772.6 | 26.6          | 71.89951          |
| <b>SnO2/PPS(0.2%)/Psk:PPS</b> | 269.8  | 138           | 3059.3 | 35.5          | 61.6683           |



**Table S6:** SnO<sub>2</sub>/Psk, SnO<sub>2</sub>/Psk:PPS(0.4%), and SnO<sub>2</sub>/PPS(0.2%)/Psk:PPS(0.4%) Photodetector device results obtained from I-V.

|                                           | $I_L$ (A)             | $I_D$ (A)              | Responsivity A/W | On/off            | Detectivity (J)       | Rise/Decay time (sec) |
|-------------------------------------------|-----------------------|------------------------|------------------|-------------------|-----------------------|-----------------------|
| SnO <sub>2</sub> /Psk                     | $4.08 \times 10^{-7}$ | $1.32 \times 10^{-10}$ | 3.26             | $3.0 \times 10^3$ | $5.62 \times 10^{12}$ | 1.00/1.12             |
| SnO <sub>2</sub> /Psk:PPS(0.4%)           | $6.58 \times 10^{-7}$ | $8.12 \times 10^{-11}$ | 5.27             | $8.1 \times 10^3$ | $1.15 \times 10^{13}$ | 0.98/0.73             |
| SnO <sub>2</sub> /PPS(0.2%)/Psk:PPS(0.4%) | $7.41 \times 10^{-7}$ | $6.05 \times 10^{-11}$ | 5.93             | $1.2 \times 10^4$ | $1.51 \times 10^{13}$ | 0.74/0.09             |

**Table S7:** The photodetector device results obtained by performing I-V measurements at various concentrations of PPS incorporation in the perovskite layer and on bare SnO<sub>2</sub>.

|                                 | $I_L$ (A)             | $I_D$ (A)              | Responsivity A/W | On/off            | Detectivity (J)       |
|---------------------------------|-----------------------|------------------------|------------------|-------------------|-----------------------|
| SnO <sub>2</sub> /Psk           | $4.08 \times 10^{-7}$ | $1.32 \times 10^{-10}$ | 3.26             | $3.0 \times 10^3$ | $5.62 \times 10^{12}$ |
| SnO <sub>2</sub> /Psk:PPS(0.2%) | $5.06 \times 10^{-7}$ | $9.69 \times 10^{-11}$ | 4.04             | $5.2 \times 10^3$ | $8.12 \times 10^{12}$ |
| SnO <sub>2</sub> /Psk:PPS(0.4%) | $6.58 \times 10^{-7}$ | $8.12 \times 10^{-11}$ | 5.27             | $8.1 \times 10^3$ | $1.15 \times 10^{13}$ |
| SnO <sub>2</sub> /Psk:PPS(0.6%) | $4.64 \times 10^{-7}$ | $9.15 \times 10^{-11}$ | 3.71             | $5.0 \times 10^3$ | $7.66 \times 10^{12}$ |

**Table S8:** The photodetector device results obtained by performing I-V measurements at various concentrations of PPS interlayer with pristine perovskite.

|                                 | $I_L$ (A)             | $I_D$ (A)              | Responsivity A/W | On/off            | Detectivity (J)       |
|---------------------------------|-----------------------|------------------------|------------------|-------------------|-----------------------|
| SnO <sub>2</sub> /Psk           | $4.08 \times 10^{-7}$ | $1.32 \times 10^{-10}$ | 3.26             | $3.0 \times 10^3$ | $5.62 \times 10^{12}$ |
| SnO <sub>2</sub> /PPS(0.1%)/Psk | $4.55 \times 10^{-7}$ | $9.42 \times 10^{-11}$ | 3.64             | $4.8 \times 10^3$ | $7.40 \times 10^{12}$ |
| SnO <sub>2</sub> /PPS(0.2%)/Psk | $4.64 \times 10^{-7}$ | $8.67 \times 10^{-11}$ | 3.71             | $5.3 \times 10^3$ | $7.88 \times 10^{12}$ |
| SnO <sub>2</sub> /PPS(0.4%)/Psk | $4.49 \times 10^{-7}$ | $1.08 \times 10^{-10}$ | 3.59             | $4.1 \times 10^3$ | $6.82 \times 10^{12}$ |

**Table S9:** The photodetector device results obtained by performing I-V measurements at various concentrations of PPS interlayer with PPS incorporated (0.4%) perovskite.

|                                           | $I_L$ (A)             | $I_D$ (A)              | Responsivity A/W | On/off            | Detectivity (J)       |
|-------------------------------------------|-----------------------|------------------------|------------------|-------------------|-----------------------|
| SnO <sub>2</sub> /Psk                     | $4.08 \times 10^{-7}$ | $1.32 \times 10^{-10}$ | 3.26             | $3.0 \times 10^3$ | $5.62 \times 10^{12}$ |
| SnO <sub>2</sub> /Psk:PPS(0.4%)           | $6.58 \times 10^{-7}$ | $8.12 \times 10^{-11}$ | 5.27             | $8.1 \times 10^3$ | $1.15 \times 10^{13}$ |
| SnO <sub>2</sub> /PPS(0.1%)/Psk:PPS(0.4%) | $7.01 \times 10^{-7}$ | $7.17 \times 10^{-11}$ | 5.60             | $9.7 \times 10^3$ | $1.31 \times 10^{13}$ |
| SnO <sub>2</sub> /PPS(0.2%)/Psk:PPS(0.4%) | $7.41 \times 10^{-7}$ | $6.05 \times 10^{-11}$ | 5.93             | $1.2 \times 10^4$ | $1.51 \times 10^{13}$ |
| SnO <sub>2</sub> /PPS(0.4%)/Psk:PPS(0.4%) | $5.31 \times 10^{-7}$ | $9.71 \times 10^{-11}$ | 4.24             | $5.4 \times 10^3$ | $8.52 \times 10^{12}$ |
